# Supplementary material
Source: Research Square preprint supplement (doi:10.21203/rs.3.rs-8993757/v1)
Supplement: Supplementary file 1 [file 8b8c828a157a6e2663b9601c.xlsx]

## Sheet: S1
Supplementary Table 1. Summary of genomic data used in this study
	Species	Family	Clade	Subfamily	Tribe	Genome size	Gene number	BUSCO	LAI	Karyotype ploidy	Chromosome ploidy	Number of chromosomes	Assembly level	Source	References
1	Pharus latifolius	Poaceae		Pharoideae	Phareae	1002933184	31913	0.975	13.7	2	2	12	chromosome	https://www.ncbi.nlm.nih.gov/datasets/genome/GCA_019359835.1/
2	Oryza sativa	Poaceae	BOP	Oryzoideae	Oryzeae	374471240	42189	0.989	23.5	2	2	12	chromosome	https://www.ncbi.nlm.nih.gov/datasets/genome/GCF_034140825.1/
3	Zizania latifolia	Poaceae	BOP	Oryzoideae	Oryzeae	595846969	36101	0.982	13.6	4	2	17	chromosome	https://www.ncbi.nlm.nih.gov/datasets/genome/GCA_048537475.1/
4	Raddia guianensis	Poaceae	BOP	Bambusoideae	Olyreae	607833752	26605	0.972	20.2	2	2	11	chromosome	https://www.ncbi.nlm.nih.gov/bioproject/?term=PRJNA948693
5	Olyra latifolia	Poaceae	BOP	Bambusoideae	Olyreae	639189835	30927	0.987	14.7	2	2	11	chromosome	https://www.ncbi.nlm.nih.gov/bioproject/?term=PRJNA948693
6	Brachypodium hybridum	Poaceae	BOP	Pooideae	Brachypodieae	509216367	70160	0.994	12.4	4	4	5+10	chromosome	https://ngdc.cncb.ac.cn/gwh/ncbi_assembly/2187384/show
7	Brachypodium distachyon	Poaceae	BOP	Pooideae	Brachypodieae	271163419	34310	0.991	15	2	2	5	chromosome	https://ncbi.nlm.nih.gov/datasets/genome/GCA_036872535.1/
8	Brachypodium stacei	Poaceae	BOP	Pooideae	Brachypodieae	234142426	29898	0.99	10.5	2	2	10	chromosome	https://ncbi.nlm.nih.gov/datasets/genome/GCA_036872525.1/
9	Brachypodium sylvaticum	Poaceae	BOP	Pooideae	Brachypodieae	358283154	35775	0.987	15.1	2	2	9	chromosome	https://phytozome-next.jgi.doe.gov/info/Bsylvaticum_v1_1
10	Alopecurus aequalis	Poaceae	BOP	Pooideae	Poeae	2849141745	61638	0.988	18.6	2	2	7	chromosome	https://ngdc.cncb.ac.cn/gwh/ncbi_assembly/2875242/show
11	Alopecurus myosuroides	Poaceae	BOP	Pooideae	Poeae	3547828963	49773	0.957	21.9	2	2	7	chromosome	https://ncbi.nlm.nih.gov/datasets/genome/GCA_028641055.1/
12	Hordeum marinum	Poaceae	BOP	Pooideae	Triticeae	3815965547	72083	0.982	12.7	2	2	7	chromosome	https://ncbi.nlm.nih.gov/datasets/genome/GCA_022496015.1/
13	Triticum monococcum	Poaceae	BOP	Pooideae	Triticeae	5116257294	37292	0.964	20.4	2	2	7	chromosome	https://ncbi.nlm.nih.gov/datasets/genome/GCA_000347455.1/
14	Elymus sibiricus	Poaceae	BOP	Pooideae	Triticeae	6929553406	89772	0.99	13.7	4	4	2×7	chromosome	https://ncbi.nlm.nih.gov/datasets/genome/GCA_039707655.1/
15	Arundo donax	Poaceae	PACMAD	Arundinoideae	Arundineae	1299920972	74358	0.994	12.6	6	6	3×12	chromosome	https://ngdc.cncb.ac.cn/gwh/Assembly/83974/show
16	Phragmites australis	Poaceae	PACMAD	Arundinoideae	Arundineae	852113342	40715	0.984	12.7	4	4	2×12	chromosome	https://ncbi.nlm.nih.gov/datasets/genome/GCA_040373225.1/
17	Cynodon dactylon	Poaceae	PACMAD	Chloridoideae	Cynodonteae	604034270	60865	0.985	19.7	4	4	2×9	chromosome	https://ncbi.nlm.nih.gov/datasets/genome/GCA_046862365.1/
18	Eleusine coracana	Poaceae	PACMAD	Chloridoideae	Cynodonteae	1111714373	48597	0.989	13.6	4	4	2×9	chromosome	https://ncbi.nlm.nih.gov/datasets/genome/GCA_032690845.1/
19	Cleistogenes songorica	Poaceae	PACMAD	Chloridoideae	Cynodonteae	540115686	55318	0.991	13.7	4	4	2×10	chromosome	https://ngdc.cncb.ac.cn/gwh/Assembly/10365/show
20	Eragrostis tef	Poaceae	PACMAD	Chloridoideae	Eragrostideae	577738711	66287	0.992	17.7	4	4	2×10	chromosome	https://genomevolution.org/coge/GenomeInfo.pl?gid=50954
21	Sporobolus maritimus	Poaceae	PACMAD	Chloridoideae	Zoysieae	1594960029	58990	0.986	7.4	8	4	2×15	scaffold	https://ngdc.cncb.ac.cn/gwh/ncbi_assembly/2875661/show
22	Sporobolus alterniflorus	Poaceae	PACMAD	Chloridoideae	Zoysieae	1631144040	70184	0.974	13.5	8	4	15+16	chromosome	https://ncbi.nlm.nih.gov/datasets/genome/GCA_048128665.1/
23	Miscanthus sinensis	Poaceae	PACMAD	Panicoideae	Andropogoneae	2079430866	61886	0.976	20.3	4	4	9+10	chromosome	https://phytozome-next.jgi.doe.gov/info/Msinensis_v7_1
24	Sorghum bicolor	Poaceae	PACMAD	Panicoideae	Andropogoneae	724849160	32855	0.986	24.4	2	2	10	chromosome	https://ncbi.nlm.nih.gov/datasets/genome/GCA_000003195.2/
25	Setaria italica	Poaceae	PACMAD	Panicoideae	Paniceae	422473852	43310	0.99	21.3	2	2	9	chromosome	https://ncbi.nlm.nih.gov/datasets/genome/GCA_000263155.2/
26	Panicum hallii	Poaceae	PACMAD	Panicoideae	Paniceae	553845420	36125	0.984	21	2	2	9	chromosome	https://ncbi.nlm.nih.gov/datasets/genome/GCA_003061485.1/
27	Cenchrus americanus	Poaceae	PACMAD	Panicoideae	Paniceae	1914840079	60590	0.987	18.5	2	2	7	chromosome	https://www.ncbi.nlm.nih.gov/datasets/genome/GCA_036936925.1/
28	Cenchrus fungigraminus	Poaceae	PACMAD	Panicoideae	Paniceae	1986758743	68233	0.994	15.9	4	4	2×7	chromosome	https://ncbi.nlm.nih.gov/datasets/genome/GCA_036936925.1/
29	Cenchrus purpureus	Poaceae	PACMAD	Panicoideae	Paniceae	1967774562	63758	0.992	12.2	4	4	2×7	chromosome	https://ngdc.cncb.ac.cn/gwh/Assembly/10340/show
30*	Aegilops umbellulata	Poaceae	BOP	Pooideae	Triticeae	4246573824	34164	0.986	16.4	2	2	7	chromosome	https://plants.ensembl.org/Aegilops_umbellulata/Info/Index
31*	Setaria viridis	Poaceae	PACMAD	Panicoideae	Paniceae	397277387	29665	0.992	29.5	2	2	9	chromosome	https://ngdc.cncb.ac.cn/gwh/ncbi_assembly/2256136/show
32*	Panicum miliaceum	Poaceae	PACMAD	Panicoideae	Paniceae	834678208	63678	0.984	20.4	4	4	2×9	chromosome	https://ngdc.cncb.ac.cn/gwh/ncbi_assembly/55534/show
33*	Juncus effusus	Juncaceae		Juncoideae		258276744	17780	0.954	7.9	2	2	20	chromosome	https://ngdc.cncb.ac.cn/gwh/ncbi_assembly/57615/show
34*	Ananas comosus	Bromeliaceae		Bromelioideae	Bromelieae	315839004	25783	0.979	21.3	2	2	25	chromosome	https://ngdc.cncb.ac.cn/gwh/ncbi_assembly/55134/show
*Additional species used for comparative karyotype analysis, but not included for karyotype evolution.

## Sheet: S2
Supplementary Table 2. Breakpoint locations of shared chromosomal fusions in representative species
Evolutionary trajectory of chromosomal karyotype		Chromosomal fusions	Species	Chromosome	Fusion breakpoints
From	To
ABPK	Zizania latifolia	ABPK_5+10_EEJ	Zizania latifolia	1	1359
		ABPK_(5+10_EEJ)+8_EEJ		1	2185
		ABPK_6+10_EEJ		3	1066
		ABPK_(6+10_EEJ)+12_EEJ		3	2031
		ABPK_1+8_EEJ		4	1296
		ABPK_9+12_EEJ		11	767
		ABPK_11+11_EEJ		12	677
		ABPK_2+6_RCT		8	199
				15	1325
	Olyra latifolia	ABPK_10+12_NCF	Olyra latifolia	10	525
				10	1845
		ABPK_1+8_RCT		1	2779
				8	1825
		ABPK_(1+8_RCT)+6_RCT		6	1929
				8	721
		ABPK_2+5_RCT		2	2681
				5	2396
		ABPK_9+11_RCT		9	1776
				11	184
	Raddia guianensis	ABPK_2+9_RCT	Raddia guianensis	2	2344
				9	1240
		ABPK_7+11_RCT		7	59
				9	218
	ABK	ABPK_8+10_NCF	Brachypodium stacei	3	1030
				3	2128
		ABPK_9+12_NCF		5	2271
				10	965
		ABPK_(9+12_NCF)+11_RCT		5	832
				10	1006
ABK	Brachypodium hybridum	ABK_6+7_NCF	Brachypodium hybridum	1	3828
				1	7068
		ABK_(6+7_NCF)+2_NCF		1	2147
				1	8206
		ABK_1+8_NCF		2	1977
				2	5337
		ABK_3+4_NCF		3	1706
				3	5899
		ABK_5+10_EEJ		4	2709
ABPK	APTK	ABPK_3+11_NCF	Alopecurus aequalis	1	4435
				1	6365
		ABPK_4+7_NCF		3	4730
				3	8260
		ABPK_6+8_NCF		4	3143
				4	5282
		ABPK_5+10_NCF		7	3707
				7	5081
		ABPK_9+12_EEJ		6	3463
APTK	Alopecurus myosuroides	APTK_1+4_RCT	Alopecurus myosuroides	1	5025
				6	3465
	ATK	APTK_1+6_RCT	Hordeum marinum	4	209
				5	7794
ATK	Triticum monococcum	ATK_4+5_RCT	Triticum monococcum	4	3237
				5	5015
	Elymus sibiricus	ATK_4+6_RCT	Elymus sibiricus	4	2538
				6	1715
ABPK	ACK	ABPK_2+10_NCF	Eragrostis tef	1	2153
				1	3835
		ABPK_6+9_NCF		2	1385
				2	3364
ACK	Sporobolus alterniflorus	ACK_4+9_NCF	Sporobolus alterniflorus	7	1412
				7	2630
		ACK_6+8_NCF		9	381
				9	1207
		ACK_5+10_NCF		15	170
				15	1005
		ACK_2+3_RCT		1	1021
				16	2838
		ACK_1+10_NCF		2	1492
				2	2689
		ACK_4+6_NCF		3	1343
				3	2256
		ACK_4+10_NCF		18	1443
				18	2433
	Eleusine coracana	ACK_9+10_NCF	Eleusine coracana	5	1337
				5	2571
	Cynodon dactylon	ACK_3+10_NCF	Cynodon dactylon	3	2733
				3	4498
	Cleistogenes songorica	ACK_1+5_RCT	Cleistogenes songorica	11	837
				17	1387
		ACK_3+7_RCT		18	1844
				20	719
ABPK	APEK	ABPK_3+10_NCF	Sorghum bicolor	1	1817
				1	3237
		ABPK_7+9_NCF		2	1287
				2	2997
APEK	Miscanthus sinensis	APEK_4+7_NCF	Miscanthus sinensis	14	1211
				14	3315
	APAK	APEK_8+9_NCF	Panicum hallii	3	732
				3	3602
APAK	Cenchrus fungigraminus	APAK_3+6_NCF	Cenchrus fungigraminus	1	1953
				4	2956
		APAK_(3+6_NCF)+8_RCT		1	2484
				4	1183
		APAK_5+8_NCF		13	3165
				13	4886
		APAK_4+9_RCT		9	3449
				12	2070
		APAK_4+9_RCT		2	2586
				5	1523
		APAK_(4+9_RCT)+7_RCT		5	541
				3	2695
		APAK_(4+9_RCT)+1_RCT		2	4150
				3	2503
	Setaria italica	APAK_3+7_RCT	Setaria italica	3	414
				7	3384

## Sheet: S3
Supplementary Table 3. Reassignment of scaffolds to chromosomes in the Sporobolus maritimus genome assembly
Initial scaffold assignment	Corrected scaffold assignment	Chromosome
3	3	1
7	7	2
20 22	20 19	3
9	9	4
2	2	5
5	5	6
4 56	4 56	7
36 25	36 25	8
11 61	11 61	9
39 23	39 23	10
13	13	11
51 44 47	51 57 59 47	12
34 28	34 35	13
53 29	53 29	14
27 55 42	27 55 42	15
21 16	21 16	16
12 26	12 26	17
64 14 19	64 14 22	18
15 45 50 58 65	15 45 50 58 65	19
1	1	20
41 30 62 38 54	41 30 62 38 54	21
60 43 40 49 18	60 43 40 49 18	22
8	8	23
6	6	24
10	10	25
66 33 31 67 68 69	66 33 31 67 68 69	26
37 57 59 46	37 44 46	27
32 35	32 28	28
52 24	52 24	29
48 17 63	48 17 63	30
Chromosomes 1-15 correspond to their homeologous counterparts 16-30, respectively
